# Supplementary material for: Imprinted Genes That Regulate Early Mammalian Growth Are Coexpressed in Somatic Stem Cells
Source: PubMed Central journal article supplement (PMC3198398; doi:10.1371/journal.pone.0026410), 2011-10-19
Supplement: pone.0026410.s004.pdf [file pone.0026410.s004.pdf]

**Table S2: SNPs used for analysis of monoallelic expression in F1 progeny of Castaneous male and C57BL/6 female mice**

| Gene        | SNP                        | Position          | BL/6 allele | Cast allele | Primers                                                    | Expressed allele |
|-------------|----------------------------|-------------------|-------------|-------------|------------------------------------------------------------|------------------|
| <i>Dlk1</i> | NES17644873                | chr12:110,698,537 | T           | C           | (F) AGTATAACAGCGGCGAGGAG<br>(R) AGCTCTAAGGAACCCCGGTA       | C                |
| <i>Gtl2</i> | NES17649632                | chr12:110,797,703 | T           | C           | (F) CACAGAGCACACAGTCACCA<br>(R) GGATTAACGATCCACCAGCA       | T                |
|             | NES17649638                | chr12:110,797,931 | A           | C           |                                                            | A                |
| <i>H19</i>  | Szabo & Mann <sup>68</sup> | chr7:149,761,689  | A           | C           | (F) AGGAATCTGCTCCAAGGTGA<br>(R) GCATTGCCAAAGAGGTTTACA      | A                |
| <i>Igf2</i> | Szabo & Mann <sup>68</sup> | chr7:149,839,519  | C           | T           | (F) TCCGAGAGGGACGTGTCTAC<br>(R) GGGTGTCAATTGGGTTGTTT       | T                |
| <i>Peg3</i> | NES16164957                | chr7:6,659,876    | G           | A           | (F) CAAAGACTTTCACTCTCATCACA<br>(R) GGCAGGAATCATTATGTATAGGG | A                |
|             | NES16164959                | chr7:6,659,966    | T           | G           |                                                            | G                |

SNPs are named according to Perlegen IDs (<http://mouse.perlegen.com/mouse/browser.html>) as previously reported [1]. Positions are based on the mm9 (NCBI37) assembly of the mouse genome. Note that the alleles listed here reflect the (+) strand, whereas the sequencing traces for *H19*, *Igf2* and *Peg3* (shown in Fig. S1) reflect the (-) strand.

## Reference for table S2

1. Frazer KA, Eskin E, Kang HM, Bogue MA, Hinds DA, et al. (2007) A sequence-based variation map of 8.27 million SNPs in inbred mouse strains. *Nature* 448: 1050-1053.
